# Supplementary material for: Prediction of final pathology depending on preoperative myometrial invasion and grade assessment in low-risk endometrial cancer patients: A Korean Gynecologic Oncology Group ancillary study
Source: PubMed Central journal article supplement (PMC11210801; doi:10.1371/journal.pone.0305360), 2024-06-27
Supplement: pone.0305360.s001.pdf [file pone.0305360.s001.pdf]

1 **S1 Fig. Comparison of the AUC performance based on the increased matching rate between preoperative and postoperative depth of MI.**

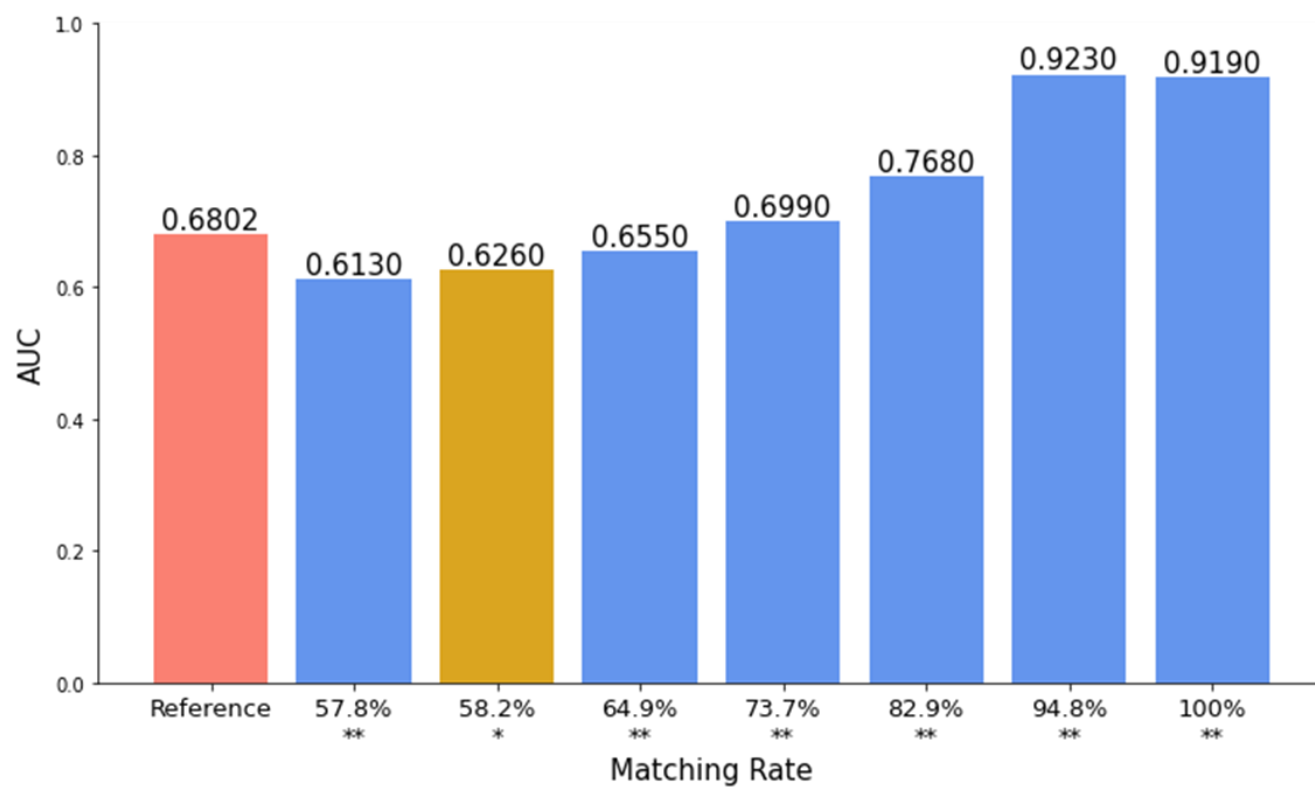

2

3 Logistic Regression was used to predict Group 1. Reference represents conventional analysis.

4 \* denotes the matching rate of the depth of MI between preoperative assessment and postoperative pathology.

5 \*\* indicates the matching rates that were randomly increased.
