# Supplementary material for: Prediction of final pathology depending on preoperative myometrial invasion and grade assessment in low-risk endometrial cancer patients: A Korean Gynecologic Oncology Group ancillary study
Source: PubMed Central journal article supplement (PMC11210801; doi:10.1371/journal.pone.0305360), 2024-06-27
Supplement: pone.0305360.s002.pdf [file pone.0305360.s002.pdf]

1 S2 Fig. Comparisons of the imputed depth of MI and postoperative depth of MI.

**a**

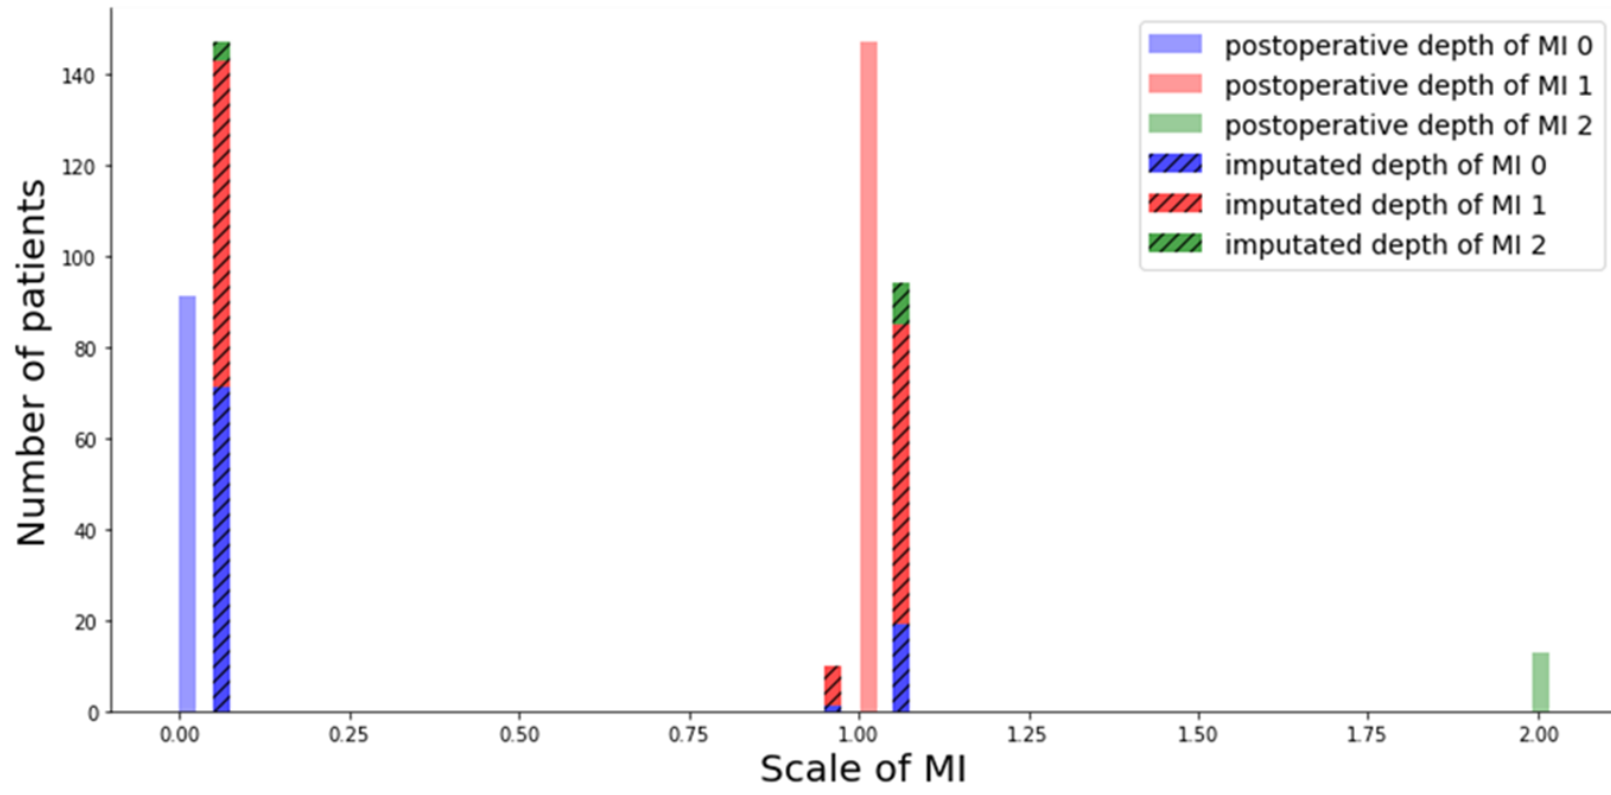

**b**

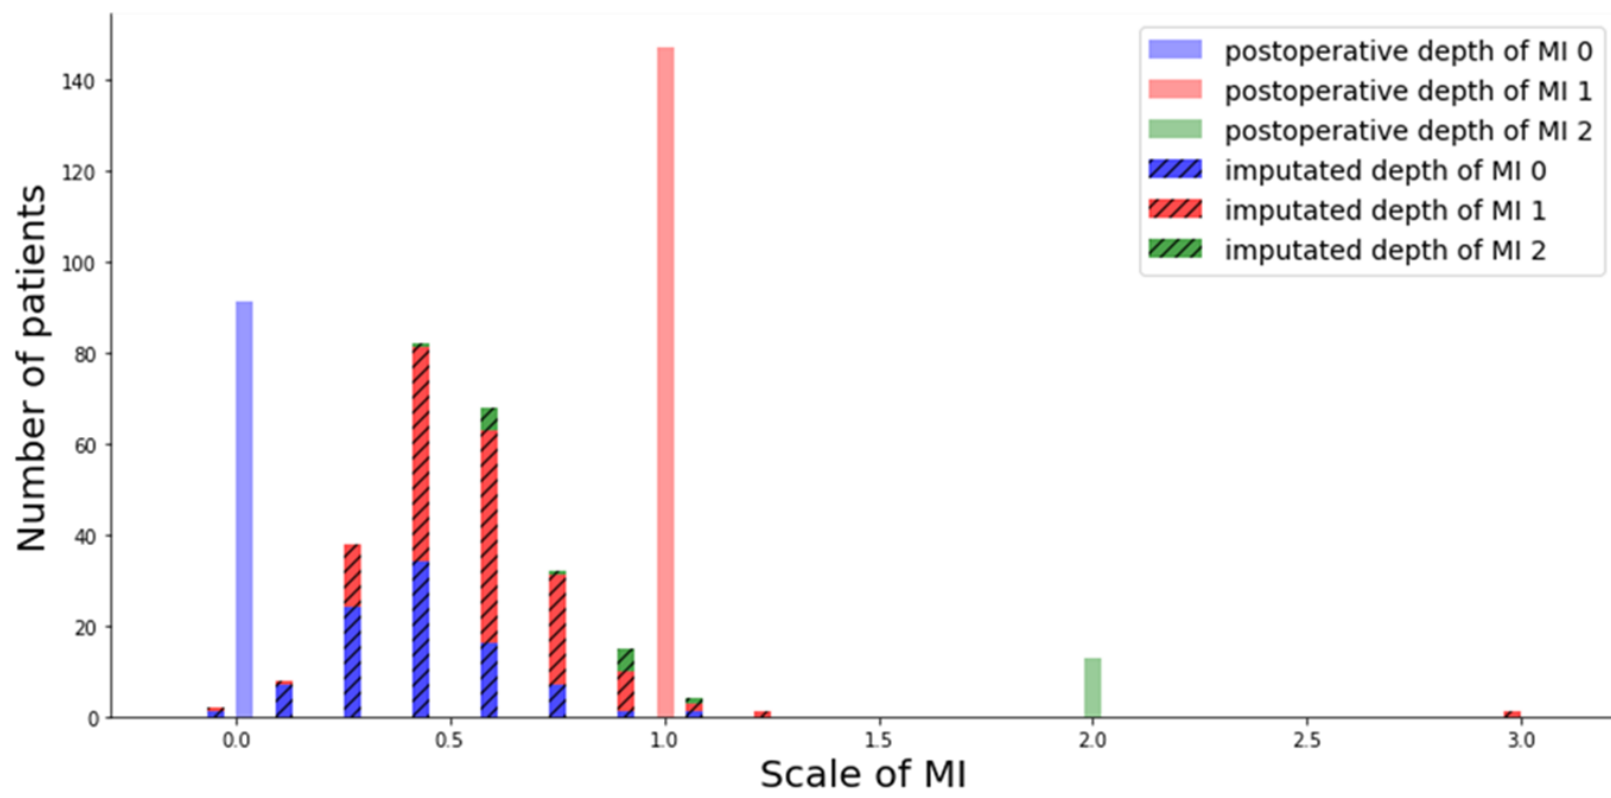

2

3 **a. NPM1, b. NPM2.** Value 0 means no MI, value 1 means  $MI < 1/2$ , and value 2 means  $MI \geq 1/2$ . MI, myometrial invasion; NPM 1, New

4 Prediction Model 1; NPM 2, New Prediction Model 2.
