# Supplementary material for: Prediction of final pathology depending on preoperative myometrial invasion and grade assessment in low-risk endometrial cancer patients: A Korean Gynecologic Oncology Group ancillary study
Source: PubMed Central journal article supplement (PMC11210801; doi:10.1371/journal.pone.0305360), 2024-06-27
Supplement: pone.0305360.s003.pdf [file pone.0305360.s003.pdf]

1 S1 Table. Relationship between the preoperative assessment and postoperative pathology in a higher-risk population than a low-risk population based on the postoperative final pathology.

|                                      | Preoperative classification |                  |               |               |                         |       |                        |       |                       |       |                       |       |
|--------------------------------------|-----------------------------|------------------|---------------|---------------|-------------------------|-------|------------------------|-------|-----------------------|-------|-----------------------|-------|
|                                      | Total<br>(n = 35/251)       |                  |               |               | Group 1<br>(n = 11/106) |       | Group 2<br>(n = 10/41) |       | Group 3<br>(n = 6/74) |       | Group 4<br>(n = 8/30) |       |
|                                      | MI                          |                  | Grade         |               | MI                      | Grade | MI                     | Grade | MI                    | Grade | MI                    | Grade |
|                                      | No<br>(n = 21)              | <1/2<br>(n = 14) | 1<br>(n = 17) | 2<br>(n = 18) | No                      | 1     | No                     | 2     | <1/2                  | 1     | <1/2                  | 2     |
| <b>Postoperative final pathology</b> |                             |                  |               |               |                         |       |                        |       |                       |       |                       |       |
| <b>Stage, n</b>                      |                             |                  |               |               |                         |       |                        |       |                       |       |                       |       |
| IA (grade 3)                         | 11 (4.4%)                   |                  |               |               | 5                       |       | 5                      |       |                       |       | 1                     |       |
| IB                                   | 12 (4.8%)                   |                  |               |               | 3                       |       |                        |       | 5                     |       | 4                     |       |
| II                                   | 6 (2.4%)                    |                  |               |               |                         |       | 2                      |       | 1                     |       | 3                     |       |
| IIIC                                 | 6 (2.4%)                    |                  |               |               | 3                       |       | 3                      |       |                       |       |                       |       |
| <b>MI, n</b>                         |                             |                  |               |               |                         |       |                        |       |                       |       |                       |       |
| No                                   | 9                           | 1                |               |               | 5                       |       | 4                      |       | -                     |       | 1                     |       |
| <1/2                                 | 8                           | 4                |               |               | 3                       |       | 5                      |       | 1                     |       | 3                     |       |
| ≥1/2                                 | 4                           | 9                |               |               | 3                       |       | 1                      |       | 5                     |       | 4                     |       |
| <b>Grade, n</b>                      |                             |                  |               |               |                         |       |                        |       |                       |       |                       |       |
| 1                                    |                             |                  | 9             | 3             |                         | 4     |                        | 1     |                       | 5     | 2                     |       |
| 2                                    |                             |                  | 3             | 9             |                         | 2     |                        | 4     |                       | 1     | 5                     |       |
| 3                                    |                             |                  | 2             | 3             |                         | 2     |                        | 2     |                       | -     | 1                     |       |
| Inadequate for interpretation        |                             |                  | 3             | 3             |                         | 3     |                        | 3     |                       | -     | -                     |       |
| <b>Postoperative classification</b>  |                             |                  |               |               |                         |       |                        |       |                       |       |                       |       |
| Higher stages, n*                    | 35 (13.9%)                  |                  |               |               | 11 (10.4%)              |       | 10 (24.4%)             |       | 6 (8.1%)              |       | 8 (26.6%)             |       |

2 \* Higher stages: higher stages than postoperative Groups 1–4. Higher stages included stage 1A and grade 3, stage IB, stage II, and stage IIIC.

3 MI, myometrial invasion.
