# Supplementary material for: Prediction of final pathology depending on preoperative myometrial invasion and grade assessment in low-risk endometrial cancer patients: A Korean Gynecologic Oncology Group ancillary study
Source: PubMed Central journal article supplement (PMC11210801; doi:10.1371/journal.pone.0305360), 2024-06-27
Supplement: pone.0305360.s004.pdf [file pone.0305360.s004.pdf]

| Patient number | Age | Menopause | Preoperative D&C     |                 |
|----------------|-----|-----------|----------------------|-----------------|
|                |     |           | Method               | Histologic type |
| 1              | 54  | Yes       | Dilatation/curettage | Endometrioid    |
| 2              | 55  | Yes       | Dilatation/curettage | Endometrioid    |
| 3              | 45  | No        | Dilatation/curettage | Endometrioid    |
| 4              | 62  | Yes       | Dilatation/curettage | Endometrioid    |
| 5              | 55  | Yes       | Dilatation/curettage | Endometrioid    |
| 6              | 51  | Yes       | Dilatation/curettage | Endometrioid    |
| 7              | 47  | No        | Dilatation/curettage | Endometrioid    |
| 8              | 45  | No        | Dilatation/curettage | Endometrioid    |
| 9              | 44  | No        | Dilatation/curettage | Endometrioid    |
| 10             | 61  | Yes       | Dilatation/curettage | Endometrioid    |
| 11             | 42  | No        | Dilatation/curettage | Endometrioid    |
| 12             | 54  | No        | Dilatation/curettage | Endometrioid    |
| 13             | 61  | Yes       | Dilatation/curettage | Endometrioid    |
| 14             | 66  | Yes       | Dilatation/curettage | Endometrioid    |
| 15             | 56  | Yes       | Dilatation/curettage | Endometrioid    |
| 16             | 41  | No        | Dilatation/curettage | Endometrioid    |
| 17             | 59  | Yes       | Dilatation/curettage | Endometrioid    |
| 18             | 52  | Yes       | Dilatation/curettage | Endometrioid    |
| 19             | 53  | Yes       | Hysteroscopy         | Endometrioid    |
| 20             | 79  | Yes       | Dilatation/curettage | Endometrioid    |
| 21             | 49  | Yes       | Dilatation/curettage | Endometrioid    |
| 22             | 51  | Yes       | Hysteroscopy         | Endometrioid    |
| 23             | 59  | Yes       | Pipelle biopsy       | Endometrioid    |
| 24             | 45  | Yes       | Dilatation/curettage | Endometrioid    |
| 25             | 55  | Yes       | Dilatation/curettage | Endometrioid    |
| 26             | 45  | No        | Dilatation/curettage | Endometrioid    |
| 27             | 53  | Yes       | Pipelle biopsy       | Endometrioid    |
| 28             | 55  | Yes       | Dilatation/curettage | Endometrioid    |
| 29             | 55  | Yes       | Dilatation/curettage | Endometrioid    |
| 30             | 72  | Yes       | Dilatation/curettage | Endometrioid    |
| 31             | 45  | No        | Dilatation/curettage | Endometrioid    |
| 32             | 52  | No        | Dilatation/curettage | Endometrioid    |
| 33             | 54  | Yes       | Dilatation/curettage | Endometrioid    |
| 34             | 75  | Yes       | Dilatation/curettage | Endometrioid    |
| 35             | 40  | No        | Dilatation/curettage | Endometrioid    |
| 36             | 69  | Yes       | Dilatation/curettage | Endometrioid    |
| 37             | 51  | No        | Dilatation/curettage | Endometrioid    |
| 38             | 37  | No        | Dilatation/curettage | Endometrioid    |
| 39             | 57  | Yes       | Dilatation/curettage | Endometrioid    |
| 40             | 42  | No        | Dilatation/curettage | Endometrioid    |
| 41             | 59  | Yes       | Dilatation/curettage | Endometrioid    |
| 42             | 61  | Yes       | Dilatation/curettage | Endometrioid    |
| 43             | 61  | Yes       | Dilatation/curettage | Endometrioid    |
| 44             | 41  | No        | Dilatation/curettage | Endometrioid    |
| 45             | 50  | No        | Dilatation/curettage | Endometrioid    |
| 46             | 47  | No        | Dilatation/curettage | Endometrioid    |
| 47             | 55  | Yes       | Dilatation/curettage | Endometrioid    |
| 48             | 52  | Yes       | Dilatation/curettage | Endometrioid    |
| 49             | 51  | Yes       | Dilatation/curettage | Endometrioid    |
| 50             | 40  | No        | Dilatation/curettage | Endometrioid    |
| 51             | 58  | Yes       | Dilatation/curettage | Endometrioid    |
| 52             | 53  | Yes       | Dilatation/curettage | Endometrioid    |
| 53             | 71  | Yes       | Dilatation/curettage | Endometrioid    |

|     |    |     |                       |              |
|-----|----|-----|-----------------------|--------------|
| 54  | 52 | Yes | Dilatation/currettage | Endometrioid |
| 55  | 61 | Yes | Dilatation/currettage | Endometrioid |
| 56  | 53 | Yes | Dilatation/currettage | Endometrioid |
| 57  | 52 | Yes | Dilatation/currettage | Endometrioid |
| 58  | 56 | Yes | Dilatation/currettage | Endometrioid |
| 59  | 54 | Yes | Dilatation/currettage | Endometrioid |
| 60  | 52 | Yes | Dilatation/currettage | Endometrioid |
| 61  | 52 | Yes | Dilatation/currettage | Endometrioid |
| 62  | 44 | No  | Dilatation/currettage | Endometrioid |
| 63  | 44 | No  | Dilatation/currettage | Endometrioid |
| 64  | 64 | Yes | Dilatation/currettage | Endometrioid |
| 65  | 59 | Yes | Dilatation/currettage | Endometrioid |
| 66  | 37 | No  | Dilatation/currettage | Endometrioid |
| 67  | 54 | Yes | Dilatation/currettage | Endometrioid |
| 68  | 37 | No  | Dilatation/currettage | Endometrioid |
| 69  | 54 | Yes | Dilatation/currettage | Endometrioid |
| 70  | 53 | Yes | Dilatation/currettage | Endometrioid |
| 71  | 29 | No  | Dilatation/currettage | Endometrioid |
| 72  | 66 | No  | Dilatation/currettage | Endometrioid |
| 73  | 42 | No  | Dilatation/currettage | Endometrioid |
| 74  | 57 | Yes | Dilatation/currettage | Endometrioid |
| 75  | 49 | Yes | Dilatation/currettage | Endometrioid |
| 76  | 67 | No  | Dilatation/currettage | Endometrioid |
| 77  | 72 | Yes | Dilatation/currettage | Endometrioid |
| 78  | 49 | Yes | Dilatation/currettage | Endometrioid |
| 79  | 62 | Yes | Dilatation/currettage | Endometrioid |
| 80  | 56 | Yes | Hysteroscopy          | Endometrioid |
| 81  | 53 | No  | Dilatation/currettage | Endometrioid |
| 82  | 68 | Yes | Dilatation/currettage | Endometrioid |
| 83  | 48 | Yes | Dilatation/currettage | Endometrioid |
| 84  | 48 | Yes | Dilatation/currettage | Endometrioid |
| 85  | 35 | No  | Dilatation/currettage | Endometrioid |
| 86  | 34 | No  | Dilatation/currettage | Endometrioid |
| 87  | 50 | No  | Dilatation/currettage | Endometrioid |
| 88  | 43 | No  | Dilatation/currettage | Endometrioid |
| 89  | 53 | Yes | Dilatation/currettage | Endometrioid |
| 90  | 51 | No  | Dilatation/currettage | Endometrioid |
| 91  | 44 | Yes | Dilatation/currettage | Endometrioid |
| 92  | 57 | Yes | Dilatation/currettage | Endometrioid |
| 93  | 54 | Yes | Pipelle biopsy        | Endometrioid |
| 94  | 56 | Yes | Dilatation/currettage | Endometrioid |
| 95  | 40 | No  | Dilatation/currettage | Endometrioid |
| 96  | 71 | Yes | Dilatation/currettage | Endometrioid |
| 97  | 38 | No  | Pipelle biopsy        | Endometrioid |
| 98  | 53 | No  | Hysteroscopy          | Endometrioid |
| 99  | 56 | Yes | Dilatation/currettage | Endometrioid |
| 100 | 41 | No  | Dilatation/currettage | Endometrioid |
| 101 | 39 | No  | Dilatation/currettage | Endometrioid |
| 102 | 62 | Yes | Dilatation/currettage | Endometrioid |
| 103 | 66 | Yes | Dilatation/currettage | Endometrioid |
| 104 | 45 | No  | Pipelle biopsy        | Endometrioid |
| 105 | 49 | Yes | Dilatation/currettage | Endometrioid |
| 106 | 70 | Yes | Dilatation/currettage | Endometrioid |
| 107 | 49 | No  | Dilatation/currettage | Endometrioid |
| 108 | 48 | No  | Dilatation/currettage | Endometrioid |
| 109 | 51 | No  | Dilatation/currettage | Endometrioid |
| 110 | 55 | Yes | Pipelle biopsy        | Endometrioid |
| 111 | 48 | No  | Dilatation/currettage | Endometrioid |
| 112 | 53 | Yes | Dilatation/currettage | Endometrioid |

|     |    |     |                       |              |
|-----|----|-----|-----------------------|--------------|
| 113 | 52 | Yes | Pipelle biopsy        | Endometrioid |
| 114 | 52 | Yes | Dilatation/currettage | Endometrioid |
| 115 | 57 | Yes | Pipelle biopsy        | Endometrioid |
| 116 | 61 | Yes | Dilatation/currettage | Endometrioid |
| 117 | 53 | Yes | Dilatation/currettage | Endometrioid |
| 118 | 71 | Yes | Dilatation/currettage | Endometrioid |
| 119 | 51 | No  | Dilatation/currettage | Endometrioid |
| 120 | 56 | Yes | Pipelle biopsy        | Endometrioid |
| 121 | 57 | Yes | Dilatation/currettage | Endometrioid |
| 122 | 54 | Yes | Pipelle biopsy        | Endometrioid |
| 123 | 60 | Yes | Dilatation/currettage | Endometrioid |
| 124 | 43 | No  | Dilatation/currettage | Endometrioid |
| 125 | 53 | Yes | Dilatation/currettage | Endometrioid |
| 126 | 63 | Yes | Dilatation/currettage | Endometrioid |
| 127 | 56 | Yes | Dilatation/currettage | Endometrioid |
| 128 | 55 | Yes | Dilatation/currettage | Endometrioid |
| 129 | 65 | Yes | Dilatation/currettage | Endometrioid |
| 130 | 58 | Yes | Dilatation/currettage | Endometrioid |
| 131 | 36 | No  | Dilatation/currettage | Endometrioid |
| 132 | 52 | No  | Dilatation/currettage | Endometrioid |
| 133 | 55 | No  | Dilatation/currettage | Endometrioid |
| 134 | 46 | No  | Dilatation/currettage | Endometrioid |
| 135 | 56 | Yes | Dilatation/currettage | Endometrioid |
| 136 | 56 | Yes | Dilatation/currettage | Endometrioid |
| 137 | 56 | Yes | Dilatation/currettage | Endometrioid |
| 138 | 51 | Yes | Dilatation/currettage | Endometrioid |
| 139 | 51 | Yes | Dilatation/currettage | Endometrioid |
| 140 | 51 | Yes | Dilatation/currettage | Endometrioid |
| 141 | 48 | Yes | Dilatation/currettage | Endometrioid |
| 142 | 48 | Yes | Dilatation/currettage | Endometrioid |
| 143 | 52 | Yes | Dilatation/currettage | Endometrioid |
| 144 | 52 | No  | Dilatation/currettage | Endometrioid |
| 145 | 45 | No  | Dilatation/currettage | Endometrioid |
| 146 | 61 | Yes | Dilatation/currettage | Endometrioid |
| 147 | 43 | No  | Dilatation/currettage | Endometrioid |
| 148 | 30 | No  | Dilatation/currettage | Endometrioid |
| 149 | 50 | No  | Dilatation/currettage | Endometrioid |
| 150 | 57 | Yes | Dilatation/currettage | Endometrioid |
| 151 | 47 | No  | Dilatation/currettage | Endometrioid |
| 152 | 43 | No  | Hysteroscopy          | Endometrioid |
| 153 | 40 | No  | Dilatation/currettage | Endometrioid |
| 154 | 41 | No  | Dilatation/currettage | Endometrioid |
| 155 | 52 | No  | Dilatation/currettage | Endometrioid |
| 156 | 51 | Yes | Dilatation/currettage | Endometrioid |
| 157 | 37 | No  | Dilatation/currettage | Endometrioid |
| 158 | 58 | Yes | Dilatation/currettage | Endometrioid |
| 159 | 67 | Yes | Dilatation/currettage | Endometrioid |
| 160 | 48 | No  | Dilatation/currettage | Endometrioid |
| 161 | 66 | Yes | Dilatation/currettage | Endometrioid |
| 162 | 49 | No  | Dilatation/currettage | Endometrioid |
| 163 | 46 | No  | Dilatation/currettage | Endometrioid |
| 164 | 49 | Yes | Dilatation/currettage | Endometrioid |
| 165 | 47 | No  | Dilatation/currettage | Endometrioid |
| 166 | 60 | Yes | Dilatation/currettage | Endometrioid |
| 167 | 52 | Yes | Hysteroscopy          | Endometrioid |
| 168 | 46 | Yes | Dilatation/currettage | Endometrioid |
| 169 | 36 | No  | Dilatation/currettage | Endometrioid |
| 170 | 62 | Yes | Pipelle biopsy        | Endometrioid |
| 171 | 58 | Yes | Dilatation/currettage | Endometrioid |

|     |    |     |                       |              |
|-----|----|-----|-----------------------|--------------|
| 172 | 50 | Yes | Dilatation/currettage | Endometrioid |
| 173 | 46 | No  | Dilatation/currettage | Endometrioid |
| 174 | 32 | No  | Dilatation/currettage | Endometrioid |
| 175 | 50 | No  | Dilatation/currettage | Endometrioid |
| 176 | 63 | Yes | Dilatation/currettage | Endometrioid |
| 177 | 56 | Yes | Dilatation/currettage | Endometrioid |
| 178 | 60 | Yes | Dilatation/currettage | Endometrioid |
| 179 | 50 | No  | Dilatation/currettage | Endometrioid |
| 180 | 51 | Yes | Dilatation/currettage | Endometrioid |
| 181 | 75 | Yes | Dilatation/currettage | Endometrioid |
| 182 | 53 | Yes | Dilatation/currettage | Endometrioid |
| 183 | 62 | Yes | Dilatation/currettage | Endometrioid |
| 184 | 56 | Yes | Dilatation/currettage | Endometrioid |
| 185 | 52 | Yes | Dilatation/currettage | Endometrioid |
| 186 | 58 | No  | Dilatation/currettage | Endometrioid |
| 187 | 48 | No  | Dilatation/currettage | Endometrioid |
| 188 | 55 | Yes | Dilatation/currettage | Endometrioid |
| 189 | 36 | No  | Dilatation/currettage | Endometrioid |
| 190 | 56 | Yes | Dilatation/currettage | Endometrioid |
| 191 | 48 | No  | Dilatation/currettage | Endometrioid |
| 192 | 49 | Yes | Dilatation/currettage | Endometrioid |
| 193 | 53 | Yes | Dilatation/currettage | Endometrioid |
| 194 | 51 | No  | Dilatation/currettage | Endometrioid |
| 195 | 43 | No  | Dilatation/currettage | Endometrioid |
| 196 | 40 | No  | Dilatation/currettage | Endometrioid |
| 197 | 37 | No  | Dilatation/currettage | Endometrioid |
| 198 | 53 | Yes | Dilatation/currettage | Endometrioid |
| 199 | 53 | No  | Dilatation/currettage | Endometrioid |
| 200 | 72 | Yes | Dilatation/currettage | Endometrioid |
| 201 | 39 | No  | Dilatation/currettage | Endometrioid |
| 202 | 32 | No  | Dilatation/currettage | Endometrioid |
| 203 | 45 | No  | Dilatation/currettage | Endometrioid |
| 204 | 51 | No  | Dilatation/currettage | Endometrioid |
| 205 | 46 | No  | Dilatation/currettage | Endometrioid |
| 206 | 51 | Yes | Dilatation/currettage | Endometrioid |
| 207 | 63 | Yes | Dilatation/currettage | Endometrioid |
| 208 | 46 | Yes | Dilatation/currettage | Endometrioid |
| 209 | 54 | Yes | Dilatation/currettage | Endometrioid |
| 210 | 60 | Yes | Dilatation/currettage | Endometrioid |
| 211 | 53 | No  | Dilatation/currettage | Endometrioid |
| 212 | 57 | Yes | Dilatation/currettage | Endometrioid |
| 213 | 47 | No  | Dilatation/currettage | Endometrioid |
| 214 | 44 | No  | Dilatation/currettage | Endometrioid |
| 215 | 75 | Yes | Dilatation/currettage | Endometrioid |
| 216 | 49 | No  | Dilatation/currettage | Endometrioid |
| 217 | 59 | Yes | Dilatation/currettage | Endometrioid |
| 218 | 61 | Yes | Dilatation/currettage | Endometrioid |
| 219 | 66 | Yes | Dilatation/currettage | Endometrioid |
| 220 | 55 | Yes | Dilatation/currettage | Endometrioid |
| 221 | 43 | No  | Dilatation/currettage | Endometrioid |
| 222 | 37 | No  | Dilatation/currettage | Endometrioid |
| 223 | 55 | Yes | Dilatation/currettage | Endometrioid |
| 224 | 58 | Yes | Dilatation/currettage | Endometrioid |
| 225 | 50 | No  | Dilatation/currettage | Endometrioid |
| 226 | 51 | Yes | Dilatation/currettage | Endometrioid |
| 227 | 35 | No  | Dilatation/currettage | Endometrioid |
| 228 | 51 | Yes | Dilatation/currettage | Endometrioid |
| 229 | 54 | Yes | Dilatation/currettage | Endometrioid |
| 230 | 51 | Yes | Dilatation/currettage | Endometrioid |



| Grade | Preoperative  | Preoperative MRI          |                               | Route            |
|-------|---------------|---------------------------|-------------------------------|------------------|
|       | CA125 (IU/ml) | Myometrial invasion depth | Tumor size (largest diameter) |                  |
| I     | 14.94         | Less than 50% (< 1/2)     | 3                             | Laparoscopic     |
| I     | 20.38         | None                      | 1.7                           | Laparoscopic     |
| I     | 43.47         | Less than 50% (< 1/2)     | 1.25                          | Laparoscopic     |
| I     | 13.83         | Less than 50% (< 1/2)     | 4.7                           | Laparoscopic     |
| I     | 9.02          | Less than 50% (< 1/2)     | 1.3                           | Laparoscopic     |
| I     | 15.84         | Less than 50% (< 1/2)     | 2.3                           | Laparoscopic     |
| I     | 34.8          | Less than 50% (< 1/2)     | 5.5                           | Laparoscopic     |
| I     | 11.02         | Less than 50% (< 1/2)     | 0.6                           | Laparoscopic     |
| I     | 28.95         | Less than 50% (< 1/2)     | 2.3                           | Laparoscopic     |
| I     | 14.8          | Less than 50% (< 1/2)     | 2                             | Laparoscopic     |
| I     | 10.16         | Less than 50% (< 1/2)     | 1.3                           | Laparoscopic     |
| I     | 23.08         | Less than 50% (< 1/2)     | .                             | Laparoscopic     |
| II    | 13.31         | Less than 50% (< 1/2)     | 3.7                           | Laparoscopic     |
| I     | 18.74         | Less than 50% (< 1/2)     | 1.7                           | Laparoscopic     |
| I     | 16.5          | None                      | 4.2                           | Laparoscopic     |
| I     | 23            | None                      | 1.5                           | Laparoscopic     |
| I     | 8.5           | None                      | 2.9                           | Open (abdominal) |
| I     | 44.3          | None                      | 2.2                           | Robotic          |
| I     | 13.5          | None                      | .                             | Laparoscopic     |
| I     | 7.8           | Less than 50% (< 1/2)     | 3.3                           | Open (abdominal) |
| II    | 26.5          | None                      | .                             | Robotic          |
| I     | 11.5          | None                      | .                             | Robotic          |
| II    | 14.6          | Less than 50% (< 1/2)     | .                             | Laparoscopic     |
| II    | 21.1          | None                      | 5                             | Open (abdominal) |
| I     | 13.2          | None                      | 2.8                           | Laparoscopic     |
| II    | 19.7          | None                      | 0                             | Laparoscopic     |
| I     | 17.8          | None                      | 2.5                           | Laparoscopic     |
| II    | 7.69          | None                      | 0                             | Laparoscopic     |
| II    | 19            | None                      | 0                             | Laparoscopic     |
| I     | 40.05         | Less than 50% (< 1/2)     | 1.8                           | Laparoscopic     |
| I     | 40.57         | Less than 50% (< 1/2)     | .                             | Open (abdominal) |
| I     | 20.15         | None                      | 2.9                           | Laparoscopic     |
| I     | 18.46         | None                      | 5.8                           | Open (abdominal) |
| I     | 8.11          | None                      | .                             | Laparoscopic     |
| I     | 37.12         | None                      | .                             | Laparoscopic     |
| I     | 39.56         | None                      | .                             | Laparoscopic     |
| I     | 20.01         | None                      | .                             | Laparoscopic     |
| I     | 18.78         | None                      | 0                             | Laparoscopic     |
| I     | 42.31         | Less than 50% (< 1/2)     | 2.5                           | Laparoscopic     |
| I     | 16.28         | None                      | .                             | Open (abdominal) |
| I     | 33.98         | None                      | .                             | Open (abdominal) |
| II    | 16.31         | None                      | .                             | Open (abdominal) |
| I     | 40.61         | None                      | .                             | Open (abdominal) |
| I     | 30.79         | Less than 50% (< 1/2)     | .                             | Laparoscopic     |
| II    | 48.6          | None                      | .                             | Laparoscopic     |
| I     | 29.4          | Less than 50% (< 1/2)     | 2                             | Laparoscopic     |
| I     | 6.5           | Less than 50% (< 1/2)     | 2                             | Laparoscopic     |
| II    | 17.9          | Less than 50% (< 1/2)     | 2.5                           | Laparoscopic     |
| II    | 29.8          | None                      | .                             | Laparoscopic     |
| I     | 20.2          | None                      | .                             | Laparoscopic     |
| I     | 20.6          | None                      | .                             | Laparoscopic     |
| I     | 15.3          | None                      | .                             | Laparoscopic     |
| II    | 16.8          | Less than 50% (< 1/2)     | 2                             | Laparoscopic     |

|    |       |                       |      |                  |
|----|-------|-----------------------|------|------------------|
| I  | 25.1  | None                  | .    | Laparoscopic     |
| II | 14.6  | Less than 50% (< 1/2) | 1.5  | Laparoscopic     |
| II | 21.3  | Less than 50% (< 1/2) | .    | Laparoscopic     |
| II | 20    | None                  | 0.1  | Laparoscopic     |
| II | 19.7  | Less than 50% (< 1/2) | 4    | Laparoscopic     |
| II | 31.1  | None                  | .    | Laparoscopic     |
| II | 21.7  | None                  | .    | Laparoscopic     |
| I  | 13.3  | Less than 50% (< 1/2) | .    | Laparoscopic     |
| II | 24.9  | Less than 50% (< 1/2) | .    | Laparoscopic     |
| I  | 19.9  | Less than 50% (< 1/2) | .    | Laparoscopic     |
| I  | 33.8  | Less than 50% (< 1/2) | 4    | Laparoscopic     |
| I  | 7     | Less than 50% (< 1/2) | .    | Laparoscopic     |
| II | 19.8  | None                  | 2    | Laparoscopic     |
| I  | 24.7  | None                  | .    | Laparoscopic     |
| II | 17.9  | Less than 50% (< 1/2) | 2    | Open (abdominal) |
| I  | 19.8  | Less than 50% (< 1/2) | .    | Laparoscopic     |
| II | 19.6  | Less than 50% (< 1/2) | 3    | Laparoscopic     |
| II | 9.1   | Less than 50% (< 1/2) | 4    | Laparoscopic     |
| I  | 19.68 | Less than 50% (< 1/2) | 1    | Open (abdominal) |
| I  | 13.93 | Less than 50% (< 1/2) | 2.8  | Laparoscopic     |
| I  | 13.64 | Less than 50% (< 1/2) | .    | Open (abdominal) |
| I  | 16.75 | Less than 50% (< 1/2) | 5    | Open (abdominal) |
| I  | 13.1  | None                  | 2.6  | Laparoscopic     |
| I  | 31    | None                  | 2.9  | Laparoscopic     |
| II | 23    | None                  | .    | Laparoscopic     |
| I  | 7     | None                  | .    | Laparoscopic     |
| I  | 15.6  | None                  | 1    | Laparoscopic     |
| II | 11    | None                  | 3    | Laparoscopic     |
| II | 25    | None                  | .    | Laparoscopic     |
| II | 81    | Less than 50% (< 1/2) | 7.58 | Laparoscopic     |
| II | 16    | None                  | 1.3  | Laparoscopic     |
| II | 13    | None                  | 3.4  | Laparoscopic     |
| II | 17    | None                  | 1    | Laparoscopic     |
| I  | 19    | None                  | 1    | Laparoscopic     |
| I  | 21    | None                  | 2.1  | Laparoscopic     |
| I  | 12    | Less than 50% (< 1/2) | 3.5  | Laparoscopic     |
| II | 19    | None                  | 0    | Laparoscopic     |
| I  | 18    | None                  | .    | Laparoscopic     |
| II | 10.3  | Less than 50% (< 1/2) | 1.7  | Open (abdominal) |
| I  | 6.1   | None                  | 1.7  | Open (abdominal) |
| I  | 5.2   | None                  | 1    | Laparoscopic     |
| II | 4.5   | Less than 50% (< 1/2) | .    | Laparoscopic     |
| I  | 23.8  | None                  | .    | Robotic          |
| I  | 7.3   | None                  | 1.2  | Laparoscopic     |
| I  | 5.7   | None                  | 1    | Laparoscopic     |
| I  | 3.9   | None                  | 1.1  | Laparoscopic     |
| I  | 5.1   | Less than 50% (< 1/2) | 4.5  | Laparoscopic     |
| I  | 3.9   | None                  | 3.6  | Robotic          |
| I  | 1.1   | None                  | 0.9  | Open (abdominal) |
| I  | 8.9   | None                  | .    | Laparoscopic     |
| I  | 3.5   | None                  | .    | Open (abdominal) |
| I  | 9.2   | Less than 50% (< 1/2) | 5    | Laparoscopic     |
| I  | 5.4   | None                  | 3    | Laparoscopic     |
| I  | 22.5  | None                  | 3    | Laparoscopic     |
| I  | 12.1  | None                  | 5.7  | Laparoscopic     |
| I  | 3.6   | None                  | 1.5  | Laparoscopic     |
| I  | 8.4   | None                  | 2    | Laparoscopic     |
| I  | 4.2   | Less than 50% (< 1/2) | 2.6  | Robotic          |
| I  | 6.7   | None                  | 3.1  | Laparoscopic     |

|    |       |                       |     |                  |
|----|-------|-----------------------|-----|------------------|
| I  | 120.1 | None                  | 2.7 | Laparoscopic     |
| I  | 9.7   | None                  | .   | Laparoscopic     |
| II | 7.6   | None                  | 2.9 | Laparoscopic     |
| I  | 3.8   | Less than 50% (< 1/2) | 2   | Robotic          |
| I  | 5.4   | None                  | 2.2 | Laparoscopic     |
| II | 7.6   | None                  | .   | Laparoscopic     |
| I  | 18.2  | Less than 50% (< 1/2) | .   | Robotic          |
| II | 7.6   | None                  | 0.8 | Laparoscopic     |
| I  | 3     | Less than 50% (< 1/2) | 2.4 | Open (abdominal) |
| I  | 17.9  | None                  | .   | Laparoscopic     |
| II | 11.8  | None                  | 1.2 | Laparoscopic     |
| I  | 7.5   | Less than 50% (< 1/2) | 3.5 | Open (abdominal) |
| I  | 6.7   | None                  | 4.2 | Laparoscopic     |
| I  | 7.1   | Less than 50% (< 1/2) | 2.8 | Laparoscopic     |
| II | 1.9   | None                  | 4.1 | Laparoscopic     |
| I  | 6.5   | Less than 50% (< 1/2) | 0   | Laparoscopic     |
| I  | 13.6  | None                  | 1.6 | Laparoscopic     |
| II | 14.1  | None                  | .   | Laparoscopic     |
| I  | 12.1  | None                  | .   | Laparoscopic     |
| I  | 5.3   | None                  | .   | Laparoscopic     |
| I  | 16.6  | None                  | .   | Laparoscopic     |
| II | 19.9  | Less than 50% (< 1/2) | 1.5 | Open (abdominal) |
| II | 23.4  | None                  | 0   | Laparoscopic     |
| I  | 15.3  | None                  | 0   | Laparoscopic     |
| I  | 19.1  | None                  | 0   | Laparoscopic     |
| I  | 9.2   | Less than 50% (< 1/2) | 0   | Laparoscopic     |
| I  | 22.8  | Less than 50% (< 1/2) | 0   | Laparoscopic     |
| II | 42.4  | Less than 50% (< 1/2) | 0   | Laparoscopic     |
| I  | 44.6  | None                  | 0   | Laparoscopic     |
| I  | 44.6  | None                  | 0   | Laparoscopic     |
| I  | 11.5  | None                  | 0   | Laparoscopic     |
| I  | 10.7  | None                  | 0   | Laparoscopic     |
| II | 18.7  | Less than 50% (< 1/2) | 1.2 | Laparoscopic     |
| I  | 5     | Less than 50% (< 1/2) | .   | Laparoscopic     |
| I  | 21.9  | None                  | 0   | Laparoscopic     |
| I  | 7.7   | None                  | 0   | Laparoscopic     |
| I  | 8.3   | None                  | 0   | Laparoscopic     |
| I  | 5.1   | Less than 50% (< 1/2) | 2.4 | Laparoscopic     |
| I  | 14    | None                  | 0   | Laparoscopic     |
| I  | 13    | Less than 50% (< 1/2) | 1.8 | Laparoscopic     |
| I  | 14.2  | None                  | .   | Laparoscopic     |
| I  | 34    | None                  | .   | Laparoscopic     |
| I  | 11.7  | Less than 50% (< 1/2) | 1.3 | Open (abdominal) |
| I  | 5.5   | None                  | .   | Laparoscopic     |
| II | 18.5  | None                  | .   | Laparoscopic     |
| II | 16.2  | None                  | .   | Laparoscopic     |
| I  | 12.2  | Less than 50% (< 1/2) | 1   | Laparoscopic     |
| I  | 26    | Less than 50% (< 1/2) | 3.3 | Robotic          |
| I  | 7.9   | Less than 50% (< 1/2) | 3   | Laparoscopic     |
| I  | 18.2  | None                  | .   | Open (abdominal) |
| I  | 17.6  | None                  | .   | Laparoscopic     |
| I  | 15.1  | Less than 50% (< 1/2) | .   | Robotic          |
| I  | 17.2  | None                  | .   | Robotic          |
| II | 10.9  | Less than 50% (< 1/2) | 1.9 | Open (abdominal) |
| II | 11.1  | Less than 50% (< 1/2) | 2   | Laparoscopic     |
| I  | 53.1  | Less than 50% (< 1/2) | 4   | Laparoscopic     |
| I  | 9.8   | None                  | .   | Laparoscopic     |
| II | 9.8   | Less than 50% (< 1/2) | .   | Laparoscopic     |
| II | 18.7  | Less than 50% (< 1/2) | 2.9 | Laparoscopic     |



|    |       |                       |     |                  |
|----|-------|-----------------------|-----|------------------|
| I  | 5.9   | Less than 50% (< 1/2) | 3   | Laparoscopic     |
| I  | 12.8  | Less than 50% (< 1/2) | .   | Laparoscopic     |
| I  | 11.6  | None                  | .   | Laparoscopic     |
| I  | 7.8   | None                  | 0   | Laparoscopic     |
| I  | 20.1  | None                  | .   | Laparoscopic     |
| I  | 22.7  | None                  | 4.1 | Laparoscopic     |
| I  | 13.5  | Less than 50% (< 1/2) | 2.3 | Laparoscopic     |
| I  | 21.2  | None                  | .   | Laparoscopic     |
| I  | 16.6  | Less than 50% (< 1/2) | .   | Laparoscopic     |
| I  | 6.6   | Less than 50% (< 1/2) | 4   | Laparoscopic     |
| II | 35.2  | Less than 50% (< 1/2) | .   | Laparoscopic     |
| I  | 18.7  | Less than 50% (< 1/2) | 3.5 | Open (abdominal) |
| I  | 14.3  | Less than 50% (< 1/2) | .   | Laparoscopic     |
| II | 9.4   | None                  | 1.3 | Laparoscopic     |
| II | 6.1   | None                  | 4   | Laparoscopic     |
| I  | 5.3   | Less than 50% (< 1/2) | 1   | Laparoscopic     |
| I  | 495   | Less than 50% (< 1/2) | 8.3 | Open (abdominal) |
| I  | 4.5   | None                  | 5   | Laparoscopic     |
| II | 10.8  | Less than 50% (< 1/2) | .   | Laparoscopic     |
| II | 6.9   | Less than 50% (< 1/2) | 3.2 | Laparoscopic     |
| I  | 5.2   | None                  | .   | Laparoscopic     |
| II | 12.7  | None                  | .   | Laparoscopic     |
| I  | 34.5  | Less than 50% (< 1/2) | .   | Laparoscopic     |
| I  | 6.7   | None                  | 1.8 | Laparoscopic     |
| I  | 11.5  | None                  | .   | Laparoscopic     |
| I  | 9.1   | Less than 50% (< 1/2) | .   | Laparoscopic     |
| II | 213   | Less than 50% (< 1/2) | 3   | Laparoscopic     |
| I  | 8.5   | None                  | .   | Laparoscopic     |
| I  | 5.5   | Less than 50% (< 1/2) | 1   | Laparoscopic     |
| I  | 5     | None                  | 1.3 | Laparoscopic     |
| I  | 30.7  | Less than 50% (< 1/2) | 4.4 | Laparoscopic     |
| II | 35.9  | None                  | 2   | Laparoscopic     |
| I  | 10.2  | None                  | .   | Laparoscopic     |
| I  | 8.7   | None                  | .   | Open (abdominal) |
| II | 7.7   | None                  | .   | Open (abdominal) |
| II | 20.6  | None                  | .   | Open (abdominal) |
| I  | 9     | Less than 50% (< 1/2) | .   | Open (abdominal) |
| II | 10.9  | Less than 50% (< 1/2) | .   | Laparoscopic     |
| I  | 5.4   | None                  | .   | Laparoscopic     |
| I  | 8.6   | Less than 50% (< 1/2) | 3.2 | Robotic          |
| I  | 42.31 | Less than 50% (< 1/2) | 2.5 | Laparoscopic     |
| I  | 13.81 | None                  | 0   | Laparoscopic     |
| I  | 20.8  | Less than 50% (< 1/2) | .   | Laparoscopic     |
| II | 24.63 | None                  | .   | Laparoscopic     |
| I  | 16.22 | None                  | 0   | Laparoscopic     |
| I  | 8.79  | None                  | 2   | Laparoscopic     |
| I  | 15.16 | None                  | 0.6 | Laparoscopic     |
| I  | 132.8 | None                  | 3   | Laparoscopic     |
| I  | 21.61 | None                  | 1.5 | Laparoscopic     |
| I  | 49.43 | None                  | .   | Laparoscopic     |
| I  | 18.04 | None                  | 2.6 | Laparoscopic     |
| II | 12.11 | None                  | 0   | Open (abdominal) |
| I  | 32.81 | Less than 50% (< 1/2) | .   | Laparoscopic     |
| I  | 26.63 | None                  | 0   | Laparoscopic     |
| II | 9     | None                  | 0   | Laparoscopic     |
| I  | 12.21 | None                  | 0   | Laparoscopic     |
| I  | 10.79 | None                  | 2   | Laparoscopic     |
| I  | 9.47  | Less than 50% (< 1/2) | 3   | Open (abdominal) |
| II | 11.41 | None                  | 0   | Laparoscopic     |



Postoperative patholog

| Stage | Histologic diagnosis      | Grade |
|-------|---------------------------|-------|
| la    | Endometrioid              | I     |
| la    | Endometrioid              | I     |
| la    | Endometrioid              | I     |
| la    | Endometrioid              | I     |
| la    | Endometrioid              | I     |
| la    | Endometrioid              | I     |
| la    | Endometrioid              | I     |
| la    | Endometrioid              | I     |
| la    | Endometrioid              | I     |
| la    | Endometrioid              | I     |
| la    | Endometrioid              | II    |
| la    | Endometrioid              | I     |
| la    | Endometrioid              | II    |
| la    | Endometrioid              | I     |
| la    | Endometrioid              | I     |
| la    | Endometrioid              | I     |
| la    | Endometrioid              | III   |
| la    | Endometrioid              | I     |
| la    | Endometrioid              | I     |
| la    | Endometrioid              | I     |
| la    | Endometrioid              | II    |
| la    | Endometrioid              | I     |
| II    | Endometrioid              | II    |
| la    | Endometrioid              | I     |
| la    | Endometrioid              | I     |
| la    | Endometrioid              | II    |
| la    | Endometrioid              | I     |
| la    | Squamous or adenosquamous | II    |
| IIIc  | Endometrioid              | II    |
| la    | Endometrioid              | I     |
| la    | Endometrioid              | I     |
| la    | Endometrioid              | I     |
| lb    | Endometrioid              | II    |
| la    | Endometrioid              | I     |
| la    | Endometrioid              | I     |
| la    | Endometrioid              | I     |
| la    | Endometrioid              | I     |
| la    | Endometrioid              | I     |
| la    | Endometrioid              | I     |
| la    | Endometrioid              | II    |
| la    | Endometrioid              | I     |
| la    | Endometrioid              | I     |
| la    | Endometrioid              | I     |
| la    | Endometrioid              | I     |
| la    | Endometrioid              | I     |
| la    | Endometrioid              | I     |
| la    | Endometrioid              | I     |
| la    | Endometrioid              | I     |
| la    | Endometrioid              | I     |
| la    | Endometrioid              | I     |
| la    | Endometrioid              | I     |
| la    | Endometrioid              | I     |
| la    | Endometrioid              | I     |
| la    | Endometrioid              | II    |
| la    | Endometrioid              | I     |
| la    | Endometrioid              | II    |

|      |                           |                               |
|------|---------------------------|-------------------------------|
| la   | Endometrioid              | I                             |
| la   | Endometrioid              | I                             |
| lb   | Endometrioid              | I                             |
| IIIc | Endometrioid              | I                             |
| lb   | Endometrioid              | II                            |
| la   | Endometrioid              | I                             |
| la   | Endometrioid              | Inadequate for interpretation |
| la   | Endometrioid              | I                             |
| la   | Endometrioid              | I                             |
| la   | Endometrioid              | I                             |
| la   | Endometrioid              | I                             |
| lb   | Endometrioid              | I                             |
| la   | Endometrioid              | I                             |
| la   | Endometrioid              | I                             |
| la   | Endometrioid              | II                            |
| la   | Endometrioid              | I                             |
| lb   | Endometrioid              | I                             |
| la   | Endometrioid              | I                             |
| la   | Endometrioid              | I                             |
| la   | Endometrioid              | I                             |
| la   | Endometrioid              | II                            |
| lb   | Endometrioid              | II                            |
| la   | Endometrioid              | I                             |
| lb   | Endometrioid              | II                            |
| la   | Endometrioid              | I                             |
| la   | Endometrioid              | Inadequate for interpretation |
| la   | Endometrioid              | I                             |
| la   | Endometrioid              | I                             |
| la   | Endometrioid              | II                            |
| II   | Endometrioid              | II                            |
| la   | Endometrioid              | II                            |
| la   | Endometrioid              | II                            |
| II   | Endometrioid              | II                            |
| la   | Endometrioid              | I                             |
| la   | Endometrioid              | II                            |
| la   | Endometrioid              | I                             |
| la   | Endometrioid              | I                             |
| la   | Endometrioid              | I                             |
| la   | Endometrioid              | III                           |
| la   | Endometrioid              | I                             |
| la   | Endometrioid              | I                             |
| la   | Endometrioid              | I                             |
| IIIc | Mixed (with endometrioid) | I                             |
| la   | Endometrioid              | I                             |
| la   | Endometrioid              | I                             |
| la   | Endometrioid              | I                             |
| la   | Endometrioid              | I                             |
| la   | Endometrioid              | I                             |
| la   | Endometrioid              | I                             |
| la   | Endometrioid              | I                             |
| la   | Endometrioid              | I                             |
| la   | Endometrioid              | I                             |
| la   | Endometrioid              | I                             |
| la   | Endometrioid              | I                             |
| la   | Endometrioid              | I                             |
| la   | Endometrioid              | I                             |
| la   | Endometrioid              | I                             |
| la   | Endometrioid              | II                            |
| la   | Endometrioid              | I                             |
| la   | Endometrioid              | I                             |
| la   | Endometrioid              | I                             |

|      |              |                               |
|------|--------------|-------------------------------|
| la   | Endometrioid | I                             |
| la   | Endometrioid | I                             |
| la   | Endometrioid | I                             |
| la   | Endometrioid | I                             |
| la   | Endometrioid | I                             |
| la   | Endometrioid | II                            |
| la   | Endometrioid | I                             |
| la   | Endometrioid | I                             |
| la   | Endometrioid | I                             |
| la   | Endometrioid | I                             |
| la   | Endometrioid | I                             |
| la   | Endometrioid | II                            |
| la   | Endometrioid | I                             |
| la   | Endometrioid | I                             |
| la   | Endometrioid | Inadequate for interpretation |
| la   | Endometrioid | I                             |
| la   | Endometrioid | I                             |
| la   | Endometrioid | II                            |
| la   | Endometrioid | Inadequate for interpretation |
| la   | Endometrioid | II                            |
| la   | Endometrioid | I                             |
| la   | Endometrioid | II                            |
| la   | Endometrioid | I                             |
| la   | Endometrioid | II                            |
| la   | Endometrioid | I                             |
| la   | Endometrioid | I                             |
| la   | Endometrioid | I                             |
| la   | Endometrioid | I                             |
| la   | Endometrioid | I                             |
| la   | Endometrioid | I                             |
| la   | Endometrioid | I                             |
| la   | Endometrioid | II                            |
| la   | Endometrioid | II                            |
| la   | Endometrioid | I                             |
| la   | Endometrioid | I                             |
| la   | Endometrioid | I                             |
| la   | Endometrioid | III                           |
| lb   | Endometrioid | I                             |
| la   | Endometrioid | I                             |
| la   | Endometrioid | II                            |
| la   | Endometrioid | I                             |
| la   | Endometrioid | I                             |
| la   | Endometrioid | I                             |
| IIIc | Endometrioid | I                             |
| la   | Endometrioid | II                            |
| la   | Endometrioid | I                             |
| la   | Endometrioid | I                             |
| la   | Endometrioid | I                             |
| lb   | Endometrioid | I                             |
| la   | Endometrioid | I                             |
| la   | Endometrioid | I                             |
| II   | Endometrioid | I                             |
| la   | Endometrioid | I                             |
| la   | Endometrioid | II                            |
| la   | Endometrioid | I                             |
| la   | Endometrioid | I                             |
| la   | Endometrioid | I                             |
| la   | Endometrioid | II                            |
| la   | Endometrioid | II                            |

|      |                           |                               |
|------|---------------------------|-------------------------------|
| la   | Endometrioid              | II                            |
| la   | Endometrioid              | I                             |
| la   | Endometrioid              | I                             |
| la   | Endometrioid              | I                             |
| la   | Endometrioid              | I                             |
| la   | Endometrioid              | II                            |
| lb   | Endometrioid              | I                             |
| la   | Endometrioid              | I                             |
| la   | Endometrioid              | I                             |
| la   | Endometrioid              | I                             |
| lb   | Endometrioid              | II                            |
| la   | Endometrioid              | I                             |
| la   | Mixed (with endometrioid) | I                             |
| la   | Endometrioid              | III                           |
| la   | Endometrioid              | III                           |
| la   | Endometrioid              | I                             |
| la   | Endometrioid              | I                             |
| la   | Endometrioid              | I                             |
| la   | Endometrioid              | II                            |
| II   | Endometrioid              | II                            |
| la   | Endometrioid              | I                             |
| la   | Endometrioid              | II                            |
| la   | Endometrioid              | II                            |
| la   | Endometrioid              | I                             |
| la   | Endometrioid              | I                             |
| la   | Endometrioid              | I                             |
| la   | Endometrioid              | II                            |
| la   | Endometrioid              | I                             |
| la   | Endometrioid              | I                             |
| la   | Endometrioid              | I                             |
| II   | Endometrioid              | II                            |
| la   | Endometrioid              | I                             |
| la   | Endometrioid              | I                             |
| la   | Endometrioid              | II                            |
| la   | Endometrioid              | II                            |
| la   | Endometrioid              | I                             |
| la   | Endometrioid              | II                            |
| la   | Endometrioid              | I                             |
| la   | Endometrioid              | I                             |
| la   | Endometrioid              | I                             |
| la   | Endometrioid              | I                             |
| la   | Endometrioid              | I                             |
| la   | Endometrioid              | I                             |
| la   | Endometrioid              | I                             |
| la   | Endometrioid              | I                             |
| la   | Endometrioid              | I                             |
| la   | Endometrioid              | I                             |
| la   | Endometrioid              | I                             |
| la   | Endometrioid              | I                             |
| la   | Endometrioid              | I                             |
| la   | Endometrioid              | II                            |
| la   | Endometrioid              | I                             |
| la   | Endometrioid              | II                            |
| la   | Endometrioid              | I                             |
| lb   | Endometrioid              | I                             |
| la   | Endometrioid              | I                             |
| la   | Endometrioid              | I                             |
| la   | Endometrioid              | I                             |
| la   | Endometrioid              | Inadequate for interpretation |
| la   | Endometrioid              | II                            |
| la   | Endometrioid              | Inadequate for interpretation |
| la   | Endometrioid              | II                            |
| IIIc | Endometrioid              | I                             |
| la   | Endometrioid              | II                            |
| la   | Endometrioid              | II                            |
| la   | Endometrioid              | I                             |



ic findings

| Myometrial invasion depth | Tumor size (largest diameter) | Extrauterine involvement | Lymphovascular space invasion (LVSI) | Metastasis of pelvic lymph node |
|---------------------------|-------------------------------|--------------------------|--------------------------------------|---------------------------------|
| Less than 50%             | 2.5                           | none                     | No                                   | 0                               |
| Less than 50%             | 1                             | none                     | No                                   | 0                               |
| Less than 50%             | 3.8                           | none                     | No                                   | 0                               |
| Less than 50%             | 4                             | none                     | No                                   | 0                               |
| Less than 50%             | 2                             | none                     | No                                   | 0                               |
| Less than 50%             | 2.5                           | none                     | No                                   | 0                               |
| Less than 50%             | 5                             | none                     | No                                   | 0                               |
| Less than 50%             | 0.8                           | none                     | No                                   | 0                               |
| Less than 50%             | 0.2                           | none                     | No                                   | 0                               |
| Less than 50%             | 2                             | none                     | No                                   | 0                               |
| Less than 50%             | 1.2                           | none                     | No                                   | 0                               |
| Less than 50%             | 1.5                           | none                     | No                                   | 0                               |
| Less than 50%             | 4.7                           | none                     | No                                   | 0                               |
| Less than 50%             | 3                             | none                     | No                                   | 0                               |
| None                      | 1.3                           | none                     | No                                   | 0                               |
| None                      | 0.3                           | none                     | No                                   | 0                               |
| Less than 50%             | 3.7                           | none                     | Yes                                  | 0                               |
| None                      | 2.2                           | none                     | No                                   | 0                               |
| Less than 50%             | 0                             | none                     | No                                   | 0                               |
| Less than 50%             | 0                             | none                     | No                                   | 0                               |
| Less than 50%             | 0                             | none                     | No                                   | 0                               |
| Less than 50%             | 0                             | none                     | No                                   | 0                               |
| Less than 50%             | 0                             | Cervix                   | No                                   | 0                               |
| Less than 50%             | 5.5                           | none                     | No                                   | 0                               |
| None                      | 3                             | none                     | No                                   | 0                               |
| None                      | 0                             | none                     | No                                   | 0                               |
| Less than 50%             | 1.5                           | none                     | No                                   | 0                               |
| None                      | 0                             | none                     | No                                   | 0                               |
| None                      | 0                             | none                     | No                                   | yes                             |
| Less than 50%             | 2.2                           | none                     | No                                   | 0                               |
| Less than 50%             | 4.5                           | none                     | No                                   | 0                               |
| Less than 50%             | 3.5                           | none                     | No                                   | 0                               |
| More than 50%             | 4.6                           | none                     | No                                   | 0                               |
| Less than 50%             | 3.5                           | none                     | No                                   | 0                               |
| Less than 50%             | 4                             | none                     | No                                   | 0                               |
| Less than 50%             | 2                             | none                     | No                                   | 0                               |
| None                      | 4                             | none                     | No                                   | 0                               |
| Less than 50%             | 4                             | none                     | No                                   | 0                               |
| Less than 50%             | 2.8                           | none                     | Yes                                  | 0                               |
| Less than 50%             | 0.5                           | none                     | No                                   | 0                               |
| Less than 50%             | 3.2                           | none                     | No                                   | 0                               |
| Less than 50%             | 1.4                           | none                     | No                                   | 0                               |
| None                      | 0                             | none                     | No                                   | 0                               |
| Less than 50%             | 4.5                           | none                     | Yes                                  | 0                               |
| Less than 50%             | 3                             | none                     | Yes                                  | 0                               |
| Less than 50%             | 4.2                           | none                     | No                                   | 0                               |
| Less than 50%             | 2.6                           | none                     | No                                   | 0                               |
| Less than 50%             | 2.3                           | none                     | No                                   | 0                               |
| None                      | 2.2                           | none                     | No                                   | 0                               |
| None                      | 0.5                           | none                     | Yes                                  | 0                               |
| Less than 50%             | 1.8                           | none                     | No                                   | 0                               |
| None                      | 1.1                           | none                     | No                                   | 0                               |
| Less than 50%             | 3                             | none                     | Yes                                  | 0                               |



|               |     |        |     |     |
|---------------|-----|--------|-----|-----|
| Less than 50% | 1.5 | none   | No  | 0   |
| Less than 50% | 1.6 | none   | Yes | 0   |
| More than 50% | 3.1 | none   | Yes | 0   |
| Less than 50% | 0.9 | none   | No  | yes |
| More than 50% | 4   | none   | No  | 0   |
| Less than 50% | 2.5 | none   | No  | 0   |
| None          | 0   | none   | No  | 0   |
| Less than 50% | 4.5 | none   | Yes | 0   |
| None          | 0.8 | none   | No  | 0   |
| None          | 1   | none   | No  | 0   |
| Less than 50% | 4   | none   | No  | 0   |
| More than 50% | 4   | none   | No  | 0   |
| Less than 50% | 0.3 | none   | No  | 0   |
| Less than 50% | 0.4 | none   | No  | 0   |
| None          | 0   | none   | No  | 0   |
| Less than 50% | 2.4 | none   | No  | 0   |
| More than 50% | 2.2 | none   | Yes | 0   |
| Less than 50% | 2.8 | none   | No  | 0   |
| Less than 50% | 5.8 | none   | No  | 0   |
| Less than 50% | 2.8 | none   | No  | 0   |
| Less than 50% | 1.7 | none   | No  | 0   |
| More than 50% | 4.2 | none   | No  | 0   |
| Less than 50% | 3.1 | none   | No  | 0   |
| More than 50% | 4.3 | none   | No  | 0   |
| Less than 50% | 0.9 | none   | No  | 0   |
| None          | 0.3 | none   | No  | 0   |
| None          | 1.1 | none   | No  | 0   |
| Less than 50% | 3.5 | none   | No  | 0   |
| Less than 50% | 4.5 | none   | Yes | 0   |
| Less than 50% | 5   | Cervix | No  | 0   |
| Less than 50% | 2.2 | none   | No  | 0   |
| Less than 50% | 2.2 | none   | No  | 0   |
| Less than 50% | 2.2 | Cervix | Yes | 0   |
| None          | 0.8 | none   | No  | 0   |
| None          | 2.3 | none   | No  | 0   |
| Less than 50% | 3.5 | none   | No  | 0   |
| None          | 1.9 | none   | No  | 0   |
| None          | 0.7 | none   | No  | 0   |
| None          | 1.5 | none   | No  | 0   |
| Less than 50% | 1.5 | none   | No  | 0   |
| Less than 50% | 0.6 | none   | No  | 0   |
| None          | 0.8 | none   | No  | 0   |
| Less than 50% | 2.5 | none   | Yes | yes |
| None          | 1.8 | none   | No  | 0   |
| None          | 0   | none   | No  | 0   |
| Less than 50% | 1   | none   | No  | 0   |
| None          | 4.1 | none   | No  | 0   |
| None          | 3.3 | none   | No  | 0   |
| Less than 50% | 1.5 | none   | No  | 0   |
| None          | 3.2 | none   | No  | 0   |
| Less than 50% | 0   | none   | No  | 0   |
| None          | 3   | none   | No  | 0   |
| Less than 50% | 0.6 | none   | No  | 0   |
| Less than 50% | 1.5 | none   | No  | 0   |
| None          | 2   | none   | No  | 0   |
| Less than 50% | 1.8 | none   | No  | 0   |
| None          | 2.3 | none   | No  | 0   |
| Less than 50% | 2.5 | none   | No  | 0   |
| Less than 50% | 2.1 | none   | No  | 0   |

|               |     |        |     |     |
|---------------|-----|--------|-----|-----|
| None          | 2.8 | none   | No  | 0   |
| Less than 50% | 1.5 | none   | No  | 0   |
| None          | 2.5 | none   | No  | 0   |
| Less than 50% | 2.2 | none   | No  | 0   |
| Less than 50% | 3.4 | none   | No  | 0   |
| Less than 50% | 1.5 | none   | yes | 0   |
| Less than 50% | 2.5 | none   | No  | 0   |
| Less than 50% | 1   | none   | No  | 0   |
| Less than 50% | 3   | none   | No  | 0   |
| Less than 50% | 1.8 | none   | No  | 0   |
| Less than 50% | 2.7 | none   | No  | 0   |
| Less than 50% | 3   | none   | No  | 0   |
| None          | 4.5 | none   | No  | 0   |
| Less than 50% | 3   | none   | No  | 0   |
| Less than 50% | 2   | none   | No  | 0   |
| Less than 50% | 1.8 | none   | No  | 0   |
| Less than 50% | 0   | none   | No  | 0   |
| Less than 50% | 2.2 | none   | No  | 0   |
| None          | 0   | none   | No  | 0   |
| None          | 0   | none   | No  | 0   |
| None          | 5.5 | none   | No  | 0   |
| Less than 50% | 5.5 | none   | No  | 0   |
| None          | 5.5 | none   | No  | 0   |
| None          | 0   | none   | No  | 0   |
| Less than 50% | 3.5 | none   | No  | 0   |
| None          | 3   | none   | No  | 0   |
| None          | 0   | none   | No  | 0   |
| None          | 0.8 | none   | No  | 0   |
| None          | 0   | none   | No  | 0   |
| None          | 0   | none   | No  | 0   |
| None          | 0.8 | none   | No  | 0   |
| None          | 1.8 | none   | No  | 0   |
| Less than 50% | 2.3 | none   | No  | 0   |
| Less than 50% | 2.3 | none   | No  | 0   |
| None          | 3.1 | none   | No  | 0   |
| None          | 2.7 | none   | No  | 0   |
| None          | 1.2 | none   | No  | 0   |
| More than 50% | 3.8 | none   | No  | 0   |
| None          | 5   | none   | No  | 0   |
| Less than 50% | 2.5 | none   | No  | 0   |
| None          | 6   | none   | No  | 0   |
| None          | 0   | none   | No  | 0   |
| Less than 50% | 2.5 | none   | No  | 0   |
| Less than 50% | 2.5 | none   | No  | yes |
| None          | 0   | none   | No  | 0   |
| Less than 50% | 1.5 | none   | No  | 0   |
| Less than 50% | 1.2 | none   | No  | 0   |
| None          | 3   | none   | No  | 0   |
| More than 50% | 3.5 | none   | No  | 0   |
| None          | 0   | none   | No  | 0   |
| None          | 0   | none   | No  | 0   |
| Less than 50% | 2.4 | Cervix | No  | 0   |
| None          | 0   | none   | No  | 0   |
| Less than 50% | 2.5 | none   | No  | 0   |
| Less than 50% | 0   | none   | No  | 0   |
| None          | 4   | none   | No  | 0   |
| None          | 0.7 | none   | No  | 0   |
| Less than 50% | 3.5 | none   | No  | 0   |
| Less than 50% | 3.7 | none   | No  | 0   |

|               |     |        |     |     |
|---------------|-----|--------|-----|-----|
| Less than 50% | 4   | none   | No  | 0   |
| None          | 1.5 | none   | No  | 0   |
| None          | 0   | none   | No  | 0   |
| None          | 0.6 | none   | No  | 0   |
| Less than 50% | 3   | none   | No  | 0   |
| Less than 50% | 4.8 | none   | No  | 0   |
| More than 50% | 2.1 | none   | No  | 0   |
| Less than 50% | 3.1 | none   | No  | 0   |
| None          | 0   | none   | No  | 0   |
| Less than 50% | 1.9 | none   | No  | 0   |
| More than 50% | 0   | none   | Yes | 0   |
| Less than 50% | 3.5 | none   | No  | 0   |
| Less than 50% | 0   | none   | No  | 0   |
| Less than 50% | 1.5 | none   | Yes | 0   |
| Less than 50% | 4.3 | none   | No  | 0   |
| None          | 2   | none   | No  | 0   |
| Less than 50% | 8.2 | none   | No  | 0   |
| Less than 50% | 5   | none   | No  | 0   |
| Less than 50% | 1.8 | none   | No  | 0   |
| Less than 50% | 3.2 | Cervix | No  | 0   |
| None          | 0   | none   | No  | 0   |
| Less than 50% | 2.8 | none   | No  | 0   |
| Less than 50% | 4.2 | none   | No  | 0   |
| None          | 5   | none   | No  | 0   |
| Less than 50% | 0.7 | none   | No  | 0   |
| Less than 50% | 1   | none   | No  | 0   |
| Less than 50% | 1.7 | none   | Yes | 0   |
| None          | 1   | none   | No  | 0   |
| Less than 50% | 1.5 | none   | No  | 0   |
| Less than 50% | 2.2 | none   | No  | 0   |
| None          | 0   | none   | No  | 0   |
| None          | 2   | Cervix | No  | 0   |
| Less than 50% | 3   | none   | No  | 0   |
| None          | 1   | none   | No  | 0   |
| Less than 50% | 1   | none   | No  | 0   |
| None          | 0   | none   | No  | 0   |
| None          | 2.5 | none   | No  | 0   |
| Less than 50% | 0.6 | none   | No  | 0   |
| None          | 0   | none   | No  | 0   |
| None          | 2.2 | none   | No  | 0   |
| Less than 50% | 2.8 | none   | Yes | 0   |
| Less than 50% | 2.1 | none   | No  | 0   |
| Less than 50% | 1.5 | none   | No  | 0   |
| None          | 0   | none   | No  | 0   |
| None          | 0.5 | none   | No  | 0   |
| Less than 50% | 2   | none   | No  | 0   |
| Less than 50% | 3   | none   | No  | 0   |
| More than 50% | 2.5 | none   | No  | 0   |
| Less than 50% | 3   | none   | No  | 0   |
| None          | 0   | none   | No  | 0   |
| None          | 3.5 | none   | No  | 0   |
| None          | 0   | none   | No  | 0   |
| Less than 50% | 2.5 | none   | Yes | 0   |
| None          | 0   | none   | No  | 0   |
| Less than 50% | 0   | none   | Yes | 0   |
| None          | 2   | none   | No  | yes |
| None          | 1.5 | none   | No  | 0   |
| Less than 50% | 4   | none   | Yes | 0   |
| Less than 50% | 2.1 | none   | No  | 0   |
